# Supplementary material for: A new solvate of clonixin and a comparison of the two clonixin solvates
Source: Royal Society of Chemistry journal article supplement (doi:10.1039/d1ra03623h), 2021-01-01
Supplement: d1ra03623h1.pdf [file d1ra03623h1.pdf]

# A New Solvate of Clonixin and a Comparison of the Two Clonixin Solvates

*Yunping Zhoujin*<sup>1</sup>, *Dr. Mingtao Zhang*<sup>2</sup>, *Dr. Sean Parkin*<sup>3</sup>, *Dr. Tonglei Li*<sup>4</sup>, *Dr.*

*Faquan Yu*<sup>\*1</sup>, *Dr. Sihui Long*<sup>\*1</sup>

Table S1. The solvents used for crystal screening

| Solvents                                                                          |                                                                                   |                                                                                     |
|-----------------------------------------------------------------------------------|-----------------------------------------------------------------------------------|-------------------------------------------------------------------------------------|
| 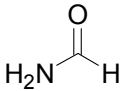 |  |  |
| formamide                                                                         | methylformamide                                                                   | N,N-diethylformamide                                                                |
|  |  |  |
| N-methyl-acetamide                                                                | N,N-dimethyl-acetamide                                                            | N,N-diethylacetamide                                                                |
|  |  |  |
| N-methylpropionamide                                                              | N,N-dimethyl-propionamide                                                         | N,N-diethylpropionamide                                                             |
|  |                                                                                   |                                                                                     |
| N,N-dimethyl-butamide                                                             |                                                                                   |                                                                                     |

In the above solvents used for crystal growth of CLX, no solvates have been obtained.

Figure S1. The  $^1\text{H}$  NMR spectrum of CLX.DMA and the zoomed in region showing the 1:1:1:1 ratio of the  $\text{CH}_3$  from CLX and three methyl groups from DMA.

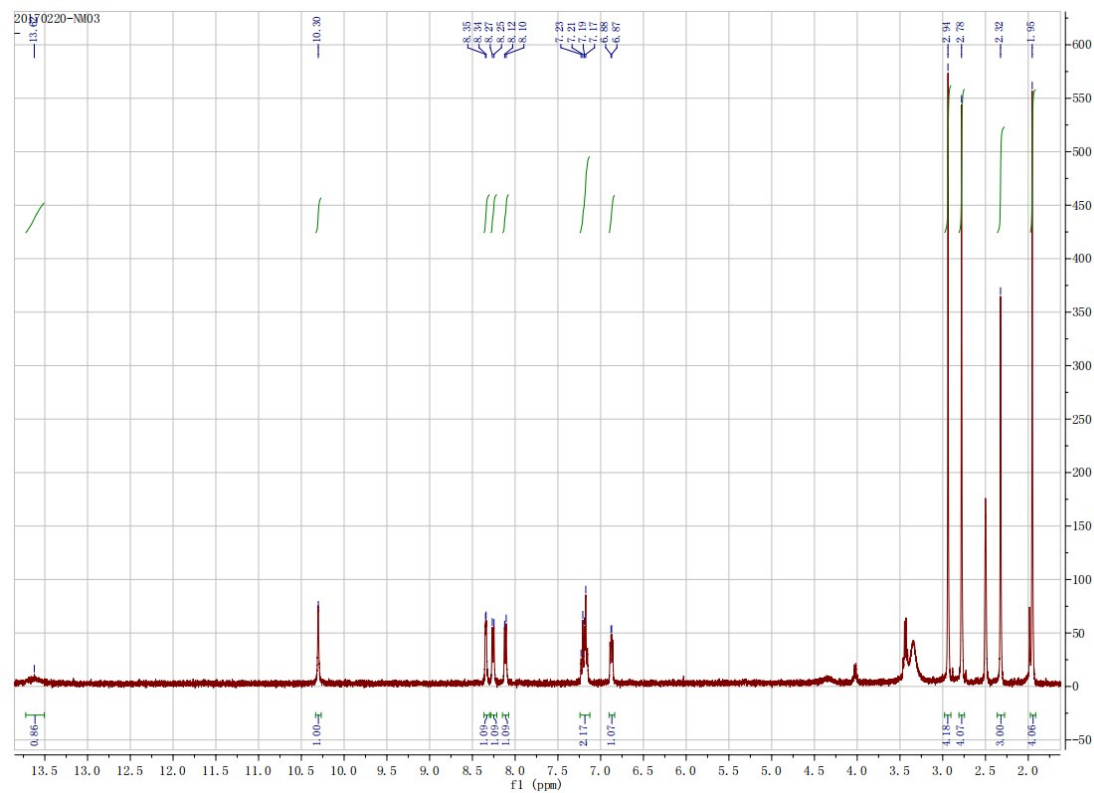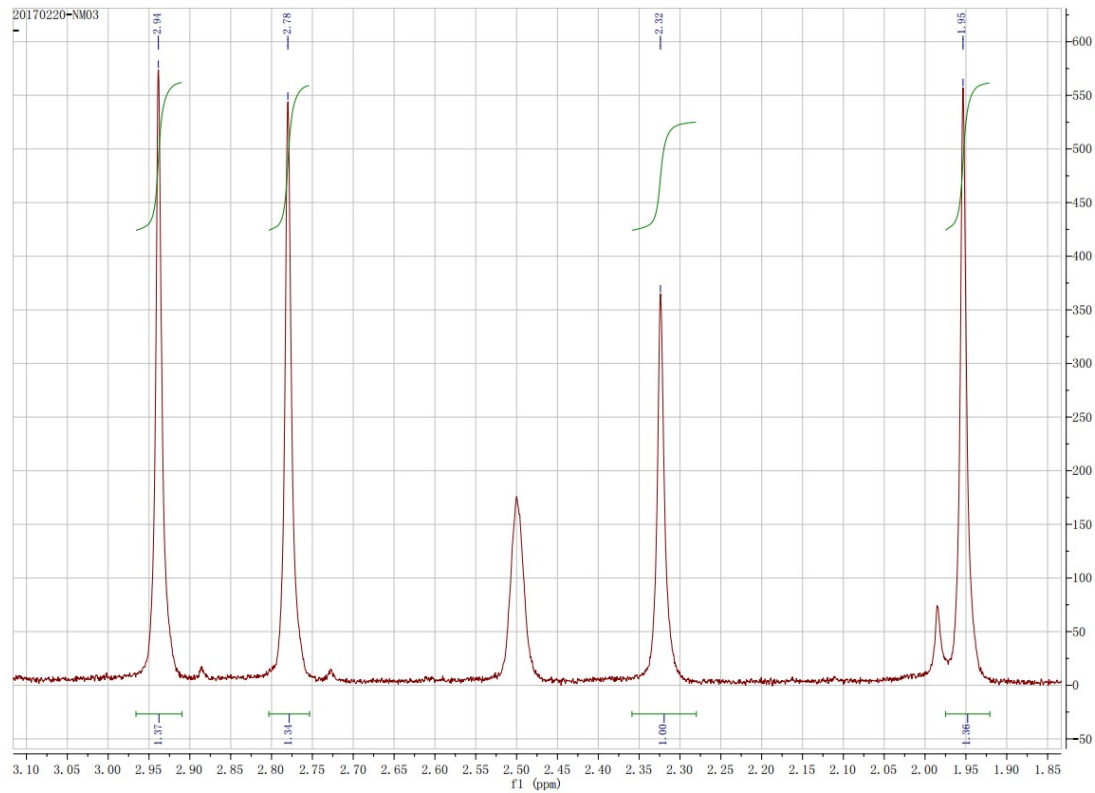

The ratio of CLX and DMA is close to 1:1, but not exactly 1:1. The discrepancy is likely due to surface solvent on the crystal.
